# Supplementary material
Source: PubMed Central journal article supplement (PMC3685284)
Supplement: supp_2012.063297_2012_063297-Contributions.pdf [file supp_2012.063297_2012_063297-Contributions.pdf]

**Manuscript no. HAEMATOL/2012/063297 entitled “Factor VIII and von Willebrand factor are ligands for the carbohydrate-receptor Siglec-5”**

**Authors: Julie N. Pegon, Mohamad Kurdi, Caterina Casari, Soline Odouard, Cécile V. Denis, Olivier D. Christophe, Peter J. Lenting**

**Information about the contributions of each person named as having participated in the study**

- 1) **Guarantor(s)**, i.e., person(s) who is (are) responsible for the integrity of the work as a whole:
- Peter J. Lenting, Inserm U770, peter.lenting@inserm.fr
  - Céline V. Denis, Inserm U770, cecile.denis@inserm.fr
  - Olivier D. Christophe, Inserm U770, olivier.christophe@inserm.fr

According to the International Committee of Medical Journal Editors (ICMJE) ([http://www.icmje.org/ethical\\_1author.html](http://www.icmje.org/ethical_1author.html)): “*Authorship credit should be based on: 1) substantial contributions to conception and design, acquisition of data, or analysis and interpretation of data; 2) drafting the article or revising it critically for important intellectual content; and 3) final approval of the version to be published. Authors should meet conditions 1, 2, and 3 ..... Acquisition of funding, collection of data, or general supervision of the research group alone does not constitute authorship*”.

The guarantors of this manuscript confirm that all persons designated as authors qualify for authorship, and that each author has participated sufficiently in the work to take public responsibility for appropriate portions of the content.

2) Authors who participated in the **conception of the study**: Peter J. Lenting, Céline V. Denis, Olivier D. Christophe

- 3) **Design & Methods**. The following authors were responsible for specific investigations:
- Julie N. Pegon, Peter J. Lenting, Céline V. Denis, Olivier D. Christophe were responsible for design of experiments
  - Julie N. Pegon, Mohamad Kurdi, Soline Odouard, Caterina Casari, Peter J. Lenting were responsible for data acquisition and data analysis
  - Julie N. Pegon, Mohamad Kurdi, Soline Odouard, Caterina Casari, Peter J. Lenting, Céline V. Denis, Olivier D. Christophe were responsible for data interpretation.

4) **Results**. The following authors were responsible for specific portions of the results, including figures and tables:

- Figure 1: Julie N. Pegon, Soline Odouard, Peter J. Lenting
- Figure 2: Julie N. Pegon, Mohamad Kurdi
- Figure 3: Julie N. Pegon, Mohamad Kurdi
- Figure 4: Julie N. Pegon, Soline Odouard
- Figure 5: Caterina Casari, Soline Odouard

- 5) **Writing the manuscript**. The following authors were responsible for writing the manuscript:
- Peter J. Lenting wrote the manuscript
  - Julie N. Pegon, Mohamad Kurdi, Soline Odouard, Caterina Casari, Céline V. Denis, Olivier D. Christophe contributed to the editing of the manuscript
  - All authors approved the final version of the manuscript

6) **Contributors Listed in Acknowledgments**:

P. Leclerc is acknowledged for support with microscopic analysis. Financial support was obtained from Agence Nationale de la Recherche (ANR-08-CEXC-018-01), Institut Servier, and Fondation pour la Recherche Médicale (FRM-SPF20101220866).
